# Supplementary material for: Photodimerization as an alternative to photocrosslinking of nanoparticles: proof of concept with amphiphilic linear polyoxazoline bearing coumarin unit
Source: Royal Society of Chemistry journal article supplement (doi:10.1039/c5py00834d), 2015-01-01
Supplement: c5py00834d1.pdf [file c5py00834d1.pdf]

# Photodimerization as Alternative to Photocrosslinking of Nanoparticles: Proof of concept with Amphiphilic Linear Polyoxazoline Bearing Coumarin Unit

L. Korchia<sup>1</sup>, C. Bouilhac,<sup>a</sup> V. Lapinte,<sup>a\*</sup> C. Travelet,<sup>b</sup> R. Borsali<sup>b</sup> and J.-J. Robin<sup>a</sup>

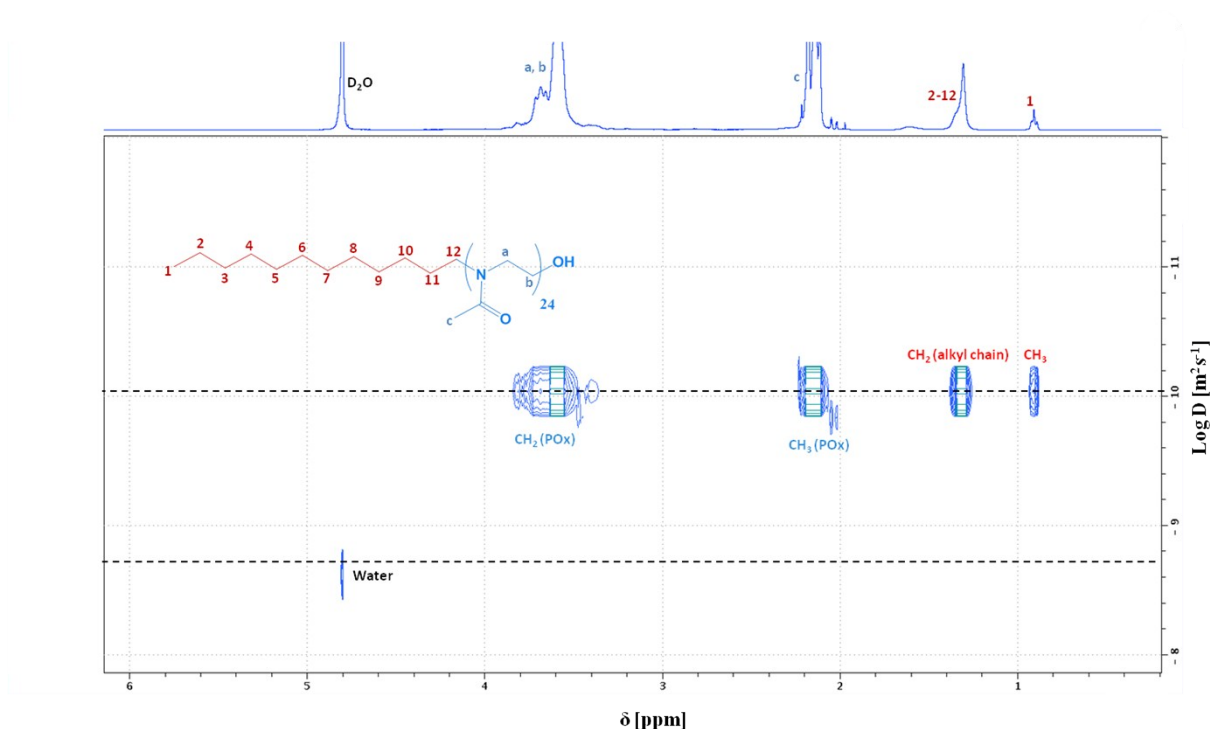

**Figure X.** <sup>1</sup>H DOSY NMR spectrum (600 MHz; D<sub>2</sub>O) of C<sub>12</sub>-POx<sub>24</sub> dissolved in water at 11.7 mg mL<sup>-1</sup>.
